# Supplementary material
Source: Springer Nature journal article supplement (https://www.springermedizin.de/resource/supplementary/12906_2011_453_MOESM5_ESM.pdf/9519822)

**A.**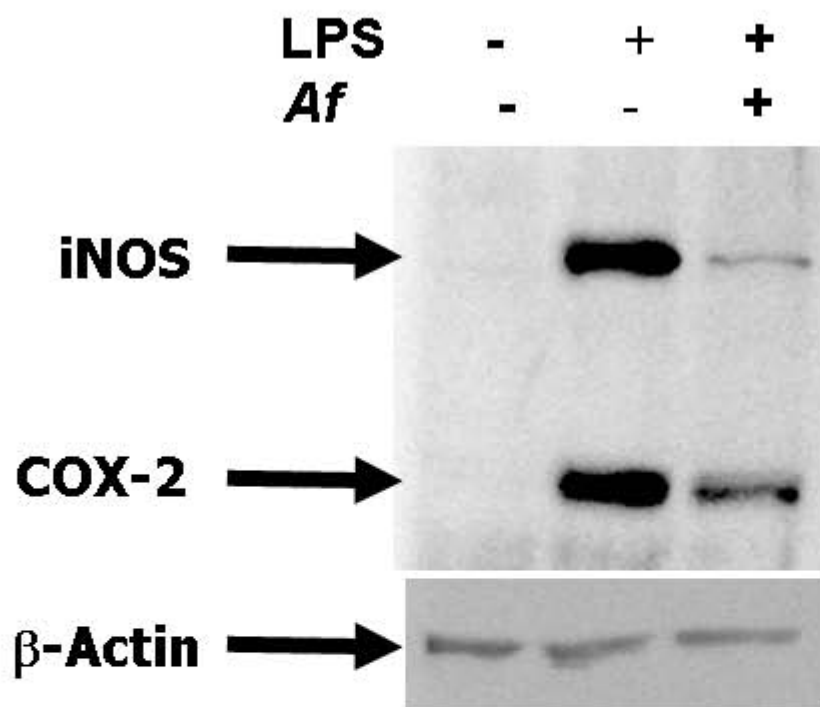**B.**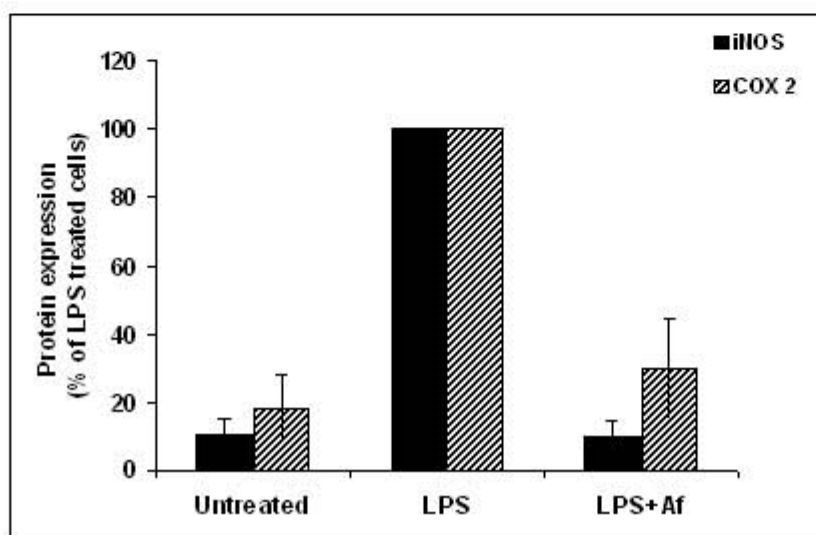

Supplement: MOESM5 [file 9519822]
